# Supplementary material
Source: PubMed Central journal article supplement (PMC4432141)
Supplement: AAC.04576-14_zac006153973so1.pdf [file AAC.04576-14_zac006153973so1.pdf]

## 1 Supplemental material

### 2 Table S1. Primer characteristics

| Name                         | Gene            | Sequence                               | Size product (bp) | Reference |
|------------------------------|-----------------|----------------------------------------|-------------------|-----------|
| CTX-M-F                      | CTX-M-gr25      | ATG TGC AGY ACC AGT AAR GTK ATG GC     |                   | (1)       |
| CTX-M-R                      | CTX-M-gr25      | TGG GTR AAR TAR GTS ACC AGA AYS AGC GG | 592               |           |
| CTX-M-1g Fw                  | CTX-M-gr1       | CCC ATG GTT AAA AAA TCA CTG C          |                   | (2)       |
| CTX-M-1g Rv                  | CTX-M-gr1       | CAG CGC TTT TGC CGT CTA AG             | ~1000             |           |
| CTX-M-2-F                    | CTX-M-gr2       | ATG ATG ACT CAG AGC ATT CG             |                   | (3)       |
| CTX-M-2-R                    | CTX-M-gr2       | TGG GTT ACG ATT TTC GCC GC             | 865               |           |
| CTX-M-9F                     | CTX-M-gr9       | TGG TGA CAA AGA GAG TGC AAC G          |                   | (4)       |
| CTX-M-9R                     | CTX-M-gr9       | TCA CAG CCC TTC GGC GAT                | 874               |           |
| CTX-M-9 <sub>792</sub> F     | CTX-M-14-like   | CTA TTT TAC CCA GCC GCA AC             |                   | (5)       |
| CTX-M-9 <sub>1029</sub> R    | CTX-M-14-like   | GTT ATG GAG CCA CGG TTG AT             | 238               |           |
| TEM-F                        | TEM             | GCG GAA CCC CTA TTT G                  |                   | (1)       |
| TEM-R                        | TEM             | ACC AAT GCT TAA TCA GTG AG             | 964               |           |
| TEM-seq                      | TEM             | GCC AAC TTA CTT CTG ACA ACG            |                   | (6)       |
| SHV-F                        | SHV             | TTA TCT CCC TGT TAG CCA CC             |                   | (1)       |
| SHV-R                        | SHV             | GAT TTG CTG ATT TCG CTC GG             | 795               |           |
| CMY-2-F                      | CMY             | ATG ATG AAA AAA TCG TTA TGC TGC        |                   | (1)       |
| CMY-2-R                      | CMY             | GCT TTT CAA GAA TGC GCC AGG            | 1117              |           |
| CMY-F-838                    | CMY             | TGG CGT ATT GGC GAT ATG TA             |                   | (6)       |
| CMY-R-857                    | CMY             | TAC ATA TCG CCA ATA CGC CA             |                   |           |
| O1-GD2M-F                    | OXA-1-like      | CAA CGG ATT AAC AGA AGC ATG GCT CG     |                   | (7)       |
| O1-GD2M-R                    | OXA-1-like      | GCT GTR AAT CCT GCA CCA GTT TTC CC     | 194               |           |
| O2-GD2M-F                    | OXA-2-like      | GAC CAA GAT TTG CGA TCA GCA ATG CG     |                   | (7)       |
| O2-GD2M-R                    | OXA-2-like      | CYT TGA CCA AGC GCT GAT GTT CYA CC     | 254               |           |
| O10-GDM-F                    | OXA-10-like     | CGC CAG AGA AGT TGG CGA AGT AAG        |                   | (7)       |
| O10-GDM-R                    | OXA-10-like     | GAA ACT CCA CTT GAT TAA CTG CGG        | 138               |           |
| <i>ampC</i> <sub>1-71</sub>  | Amp-Chromosomal | AAT GGG TTT TCT ACG GTC TG             |                   | (8)       |
| <i>ampC</i> <sub>2-120</sub> | Amp-Chromosomal | GGG CAG CAA ATG TGG AGC AA             | 191               |           |

3

4

5 Table S3. Complete quantitative and genotypic characteristics

| SampleID | CFU/g    | F      | Isolate    | DogID | t-value | Species                 | Gene characterisation* |
|----------|----------|--------|------------|-------|---------|-------------------------|------------------------|
| 13S00698 | 1.96E+04 | 0.0000 | 13S00698-4 | 23A   | 1       | <i>Escherichia coli</i> | <i>ampC</i> type WT    |
|          |          |        | 13S00698-5 | 23A   | 1       | <i>Escherichia coli</i> | <i>ampC</i> type 18    |
| 13S00699 | 6.60E+04 | 0.0000 | 13S00699-1 | 19A   | 1       | <i>Escherichia coli</i> | CMY 2/61               |
|          |          |        | 13S00699-2 | 19A   | 1       | <i>Escherichia coli</i> | CMY 2/61               |
|          |          |        | 13S00699-3 | 19A   | 1       | <i>Escherichia coli</i> | TEM 1b&52StPaul        |
| 13S00700 | 9.43E+05 | 0.0003 | 13S00700-1 | 24B   | 1       | <i>Escherichia coli</i> | TEM 1b                 |
|          |          |        | 13S00700-2 | 24B   | 1       | <i>Escherichia coli</i> | TEM 1b                 |
|          |          |        | 13S00700-3 | 24B   | 1       | <i>Escherichia coli</i> | TEM 1b                 |
| 13S00701 | 8.49E+05 | 0.0016 | 13S00701-1 | 24A   | 1       | <i>Escherichia coli</i> | TEM 1b                 |
|          |          |        | 13S00701-2 | 24A   | 1       | <i>Escherichia coli</i> | TEM 1b                 |
|          |          |        | 13S00701-3 | 24A   | 1       | <i>Escherichia coli</i> | TEM 1b                 |
| 13S00702 | 1.73E+06 | 0.0020 | 13S00702-1 | 17A   | 1       | <i>Escherichia coli</i> | <i>ampC</i> type 3     |
|          |          |        | 13S00702-2 | 17A   | 1       | <i>Escherichia coli</i> | <i>ampC</i> type 3     |
|          |          |        | 13S00702-3 | 17A   | 1       | <i>Escherichia coli</i> | <i>ampC</i> type 3     |
| 13S00703 | 9.62E+04 | 0.0000 | 13S00703-1 | 17B   | 1       | <i>Escherichia coli</i> | <i>ampC</i> type 3     |
|          |          |        | 13S00703-2 | 17B   | 1       | <i>Escherichia coli</i> | <i>ampC</i> type 18    |
|          |          |        | 13S00703-3 | 17B   | 1       | <i>Escherichia coli</i> | <i>ampC</i> type 3     |
| 13S00705 | 1.33E+05 | 0.0006 | 13S00705-1 | 15B   | 1       | <i>Escherichia coli</i> | TEM 1b&52c             |
|          |          |        | 13S00705-2 | 15B   | 1       | <i>Escherichia coli</i> | TEM 1b&52c             |
|          |          |        | 13S00705-3 | 15B   | 1       | <i>Escherichia coli</i> | TEM 1b&52c             |
| 13S00706 | 1.36E+05 | 0.0001 | 13S00706-1 | 15A   | 1       | <i>Escherichia coli</i> | CTX-M 1/61             |
|          |          |        | 13S00706-2 | 15A   | 1       | <i>Escherichia coli</i> | TEM 1b                 |
|          |          |        | 13S00706-3 | 15A   | 1       | <i>Escherichia coli</i> | CTX-M 1/61             |
| 13S00707 | 2.45E+07 | 0.0006 | 13S00707-1 | 15C   | 1       | <i>Escherichia coli</i> | TEM 1b&52c             |
|          |          |        | 13S00707-2 | 15C   | 1       | <i>Escherichia coli</i> | CTX-M 1    TEM-1b      |
|          |          |        | 13S00707-3 | 15C   | 1       | <i>Escherichia coli</i> | CTX-M 14/18            |
|          |          |        | 13S00707-4 | 15C   | 1       | <i>Escherichia coli</i> | CMY 2/61               |
| 13S00710 | 9.43E+03 | 0.0066 | 13S00710-5 | 16A   | 1       | <i>Escherichia coli</i> | CTX-M 1    TEM 1b      |
|          |          |        | 13S00710-6 | 16A   | 1       | <i>Escherichia coli</i> | CMY 2                  |
| 13S00711 | 1.37E+06 | 0.0482 | 13S00711-1 | 16B   | 1       | <i>Escherichia coli</i> | CTX-M 1    TEM 1b      |
|          |          |        | 13S00711-2 | 16B   | 1       | <i>Escherichia coli</i> | CTX-M 1    TEM 1b      |
|          |          |        | 13S00711-3 | 16B   | 1       | <i>Escherichia coli</i> | CTX-M 1    TEM 1b      |

|          |          |        |            |     |   |                          |                                |
|----------|----------|--------|------------|-----|---|--------------------------|--------------------------------|
| 13S00712 | 1.63E+06 | 0.0001 | 13S00712-1 | 18A | 1 | <i>Escherichia coli</i>  | TEM 84                         |
|          |          |        | 13S00712-2 | 18A | 1 | <i>Escherichia coli</i>  | CTX-M 15/28 OXA 1/30           |
|          |          |        | 13S00712-3 | 18A | 1 | <i>Escherichia coli</i>  | CTX-M 15/28 OXA 1/30 TEM 1varA |
| 13S00713 | 5.66E+05 | 0.0001 | 13S00713-1 | 21B | 1 | <i>Escherichia coli</i>  | CTX-M 1                        |
|          |          |        | 13S00713-2 | 21B | 1 | <i>Escherichia coli</i>  | SHV 12/129                     |
|          |          |        | 13S00713-3 | 21B | 1 | <i>Escherichia coli</i>  | SHV 12/129                     |
|          |          |        | 13S00713-4 | 21B | 1 | <i>Escherichia coli</i>  | CTX-M 14/18                    |
| 13S00715 | 1.92E+06 | 0.0007 | 13S00715-1 | 22A | 1 | <i>Escherichia coli</i>  | SHV 12/129                     |
|          |          |        | 13S00715-2 | 22A | 1 | <i>Escherichia coli</i>  | CTX-M 55/57/79                 |
|          |          |        | 13S00715-3 | 22A | 1 | <i>Escherichia coli</i>  | CTX-M 55/57/79                 |
| 13S00723 | 7.00E+05 | 0.0007 | 13S00723-1 | 10A | 2 | <i>Escherichia coli</i>  | <i>ampC</i> type 3             |
|          |          |        | 13S00723-2 | 10A | 2 | <i>Escherichia coli</i>  | CTX-M 1/61                     |
|          |          |        | 13S00723-3 | 10A | 2 | <i>Escherichia coli</i>  | <i>ampC</i> type 3             |
| 13S00738 | 3.85E+05 | 0.0129 | 13S00738-5 | 1A  | 3 | <i>Escherichia coli</i>  | CTX-M 14/18                    |
|          |          |        | 13S00738-6 | 1A  | 3 | <i>Escherichia coli</i>  | CTX-M 1/61 TEM 1b/104          |
|          |          |        | 13S00738-7 | 1A  | 3 | <i>Escherichia coli</i>  | CTX-M 1/61 TEM 1b/104          |
| 13S00739 | 1.82E+04 | 0.0017 | 13S00739-4 | 1B  | 3 | <i>Escherichia coli</i>  | <i>ampC</i> type 3             |
|          |          |        | 13S00739-5 | 1B  | 3 | <i>Escherichia coli</i>  | <i>ampC</i> type 3             |
| 13S00740 | 2.13E+04 | 0.0436 | 13S00740-5 | 5B  | 4 | <i>Acinetobacter spp</i> |                                |
|          |          |        | 13S00740-6 | 5B  | 4 | <i>Acinetobacter spp</i> |                                |
|          |          |        | 13S00740-7 | 5B  | 4 | <i>Pseudomonas spp</i>   |                                |
| 13S00741 | 3.33E+05 | 0.0004 | 13S00741-4 | 12A | 4 | <i>Escherichia coli</i>  | CTX-M 1/61                     |
|          |          |        | 13S00741-5 | 12A | 4 | <i>Escherichia coli</i>  | SHV 12/129 TEM 1b              |
|          |          |        | 13S00741-6 | 12A | 4 | <i>Escherichia coli</i>  | SHV 12/129 TEM 1b              |
|          |          |        | 13S00741-7 | 12A | 4 | <i>Escherichia coli</i>  | SHV 12/129 TEM 1b/104          |
| 13S00745 | 1.28E+05 | 0.0002 | 13S00745-5 | 21A | 4 | <i>Escherichia coli</i>  | CTX-M 1/61                     |
|          |          |        | 13S00745-6 | 21A | 4 | <i>Escherichia coli</i>  | SHV 12/129                     |
|          |          |        | 13S00745-7 | 21A | 4 | <i>Escherichia coli</i>  | SHV 12/129                     |
| 13S00746 | 3.23E+06 | 0.0004 | 13S00746-5 | 21B | 4 | <i>Escherichia coli</i>  | CTX-M 1 TEM 1b                 |
|          |          |        | 13S00746-6 | 21B | 4 | <i>Escherichia coli</i>  | SHV 12/129                     |
|          |          |        | 13S00746-7 | 21B | 4 | <i>Escherichia coli</i>  | SHV 12/129                     |
| 13S00747 | 2.08E+06 | 0.0017 | 13S00747-4 | 9B  | 4 | <i>Escherichia coli</i>  | <i>ampC</i> type 3             |
|          |          |        | 13S00747-5 | 9B  | 4 | <i>Escherichia coli</i>  | <i>ampC</i> type 3             |
|          |          |        | 13S00747-6 | 9B  | 4 | <i>Escherichia coli</i>  | <i>ampC</i> type 3             |
| 13S00748 | 1.09E+07 | 0.0003 | 13S00748-5 | 9A  | 4 | <i>Escherichia coli</i>  | CTX-M 14/18 TEM 1b/104         |

|          |          |        |            |     |   |                          |                                |
|----------|----------|--------|------------|-----|---|--------------------------|--------------------------------|
|          |          |        | 13S00748-6 | 9A  | 4 | <i>Escherichia coli</i>  | CMY 2/61 TEM 1b/104            |
|          |          |        | 13S00748-7 | 9A  | 4 | <i>Escherichia coli</i>  | CTX-M 15/28 TEM 1varA          |
|          |          |        | 13S00748-8 | 9A  | 4 | <i>Escherichia coli</i>  | <i>ampC</i> type 3             |
| 13S00749 | 1.17E+07 | 0.0003 | 13S00749-5 | 9C  | 4 | <i>Escherichia coli</i>  | CTX-M 15/28 TEM 1varA          |
|          |          |        | 13S00749-6 | 9C  | 4 | <i>Escherichia coli</i>  | CTX-M 15/28 TEM 1varA          |
|          |          |        | 13S00749-7 | 9C  | 4 | <i>Escherichia coli</i>  | <i>ampC</i> type 3             |
|          |          |        | 13S00749-8 | 9C  | 4 | <i>Escherichia coli</i>  | <i>ampC</i> type 3             |
| 13S00751 | 1.00E+04 | 0.0455 | 13S00751-3 | 5B  | 5 | <i>Acinetobacter spp</i> |                                |
| 13S00753 | 4.81E+07 | 0.0016 | 13S00753-4 | 11A | 5 | <i>Escherichia coli</i>  | CTX-M 1/61 TEM 1b/104          |
|          |          |        | 13S00753-5 | 11A | 5 | <i>Escherichia coli</i>  | TEM 52c                        |
|          |          |        | 13S00753-6 | 11A | 5 | <i>Escherichia coli</i>  | <i>ampC</i> type 3             |
| 13S00754 | 1.94E+06 | 0.0027 | 13S00754-4 | 15A | 5 | <i>Escherichia coli</i>  | CTX-M 14/18 TEM 1b             |
|          |          |        | 13S00754-5 | 15A | 5 | <i>Escherichia coli</i>  | CTX-M 32                       |
|          |          |        | 13S00754-6 | 15A | 5 | <i>Escherichia coli</i>  | TEM 52c                        |
|          |          |        | 13S00754-7 | 15A | 5 | <i>Escherichia coli</i>  | CMY 2/61                       |
| 13S00756 | 3.77E+07 | 0.0363 | 13S00756-4 | 15C | 5 | <i>Escherichia coli</i>  | <i>ampC</i> type 3             |
|          |          |        | 13S00756-5 | 15C | 5 | <i>Escherichia coli</i>  | <i>ampC</i> type 3             |
|          |          |        | 13S00756-6 | 15C | 5 | <i>Escherichia coli</i>  | <i>ampC</i> type 3 mutant      |
| 13S00758 | 1.04E+04 | 0.0000 | 13S00758-4 | 22A | 5 | <i>Escherichia coli</i>  | TEM 1varA                      |
|          |          |        | 13S00758-5 | 22A | 5 | <i>Escherichia coli</i>  | CTX-M 1 TEM 1b                 |
|          |          |        | 13S00758-6 | 22A | 5 | <i>Escherichia coli</i>  | CTX-M 2/20/44/56/97 TEM 1b&52c |
| 13S00761 | 5.21E+04 | 0.0000 | 13S00761-4 | 17A | 5 | <i>Escherichia coli</i>  | CTX-M 32                       |
|          |          |        | 13S00761-5 | 17A | 5 | <i>Escherichia coli</i>  | CTX-M 32                       |
|          |          |        | 13S00761-6 | 17A | 5 | <i>Escherichia coli</i>  | CTX-M 32                       |
| 13S00762 | 1.57E+05 | 0.0001 | 13S00762-4 | 17B | 5 | <i>Escherichia coli</i>  | CTX-M 1 TEM 1b                 |
|          |          |        | 13S00762-5 | 17B | 5 | <i>Escherichia coli</i>  | CTX-M 1                        |
|          |          |        | 13S00762-6 | 17B | 5 | <i>Escherichia coli</i>  | CTX-M 14/18 TEM 1b             |
| 13S00763 | 4.00E+04 | 0.0004 | 13S00763-4 | 19A | 5 | <i>Escherichia coli</i>  | CMY 2/61 TEM 1b                |
|          |          |        | 13S00763-5 | 19A | 5 | <i>Escherichia coli</i>  | SHV 12/129                     |
|          |          |        | 13S00763-6 | 19A | 5 | <i>Escherichia coli</i>  | SHV 12/129                     |
| 13S00769 | 1.86E+07 | 0.0024 | 13S00769-4 | 10A | 5 | <i>Escherichia coli</i>  | TEM 1b&52c                     |
|          |          |        | 13S00769-5 | 10A | 5 | <i>Escherichia coli</i>  | CTX-M 1                        |
|          |          |        | 13S00769-6 | 10A | 5 | <i>Escherichia coli</i>  | CTX-M 1 TEM 1b                 |
|          |          |        | 13S00769-7 | 10A | 5 | <i>Escherichia coli</i>  | CTX-M 1 TEM 1b                 |
| 13S00770 | 3.94E+06 | 0.0015 | 13S00770-4 | 18A | 5 | <i>Escherichia coli</i>  | CTX-M 1                        |

|          |          |        |            |     |   |                             |                           |
|----------|----------|--------|------------|-----|---|-----------------------------|---------------------------|
|          |          |        | 13S00770-5 | 18A | 5 | <i>Escherichia coli</i>     | TEM 1d                    |
|          |          |        | 13S00770-6 | 18A | 5 | <i>Escherichia coli</i>     | CTX-M 1                   |
|          |          |        | 13S00770-7 | 18A | 5 | <i>Escherichia coli</i>     | <i>ampC</i> type 3        |
| 13S00771 | 2.88E+04 | 0.0000 | 13S00771-4 | 23A | 5 | <i>Escherichia coli</i>     | <i>ampC</i> type 3        |
|          |          |        | 13S00771-5 | 23A | 5 | <i>Escherichia coli</i>     | CTX-M 1                   |
|          |          |        | 13S00771-6 | 23A | 5 | <i>Escherichia coli</i>     | <i>ampC</i> type 3        |
| 13S00774 | 1.00E+02 | 0.0000 | 13S00774-4 | 5B  | 6 | <i>Escherichia coli</i>     | CMY 2/61                  |
| 13S00775 | 2.94E+05 | 0.0001 | 13S00775-4 | 24A | 6 | <i>Escherichia coli</i>     | TEM 52c                   |
|          |          |        | 13S00775-5 | 24A | 6 | <i>Escherichia coli</i>     | CMY 2/61                  |
|          |          |        | 13S00775-6 | 24A | 6 | <i>Escherichia coli</i>     | TEM 52c                   |
| 13S00776 | 1.00E+05 | 0.0000 | 13S00776-4 | 24B | 6 | <i>Escherichia coli</i>     | CMY 2/61                  |
|          |          |        | 13S00776-5 | 24B | 6 | <i>Escherichia coli</i>     | CTX-M 1                   |
|          |          |        | 13S00776-6 | 24B | 6 | <i>Escherichia coli</i>     | <i>ampC</i> type 3 mutant |
| 13S00777 | 1.89E+04 | 0.0067 | 13S00777-4 | 12B | 6 | <i>Acinetobacter spp</i>    |                           |
|          |          |        | 13S00777-5 | 12B | 6 | <i>Acinetobacter spp</i>    |                           |
|          |          |        | 13S00777-6 | 12B | 6 | <i>Escherichia coli</i>     |                           |
| 13S00778 | 1.00E+02 | 0.0000 | 13S00778-4 | 12A | 6 | <i>Escherichia coli</i>     | CMY 2/61 TEM 33           |
|          |          |        | 13S00778-5 | 12A | 6 | <i>Acinetobacter spp</i>    |                           |
|          |          |        | 13S00778-6 | 12A | 6 | <i>Acinetobacter spp</i>    |                           |
|          |          |        | 13S00778-7 | 12A | 6 | <i>Pseudomonas spp</i>      |                           |
| 13S00784 | 1.00E+02 | 0.0000 | 13S00784-4 | 5A  | 7 | <i>Unidentified species</i> |                           |
|          |          |        | 13S00784-5 | 5A  | 7 | <i>Pseudomonas spp</i>      |                           |
| 13S00788 | 7.29E+03 | 0.0001 | 13S00788-4 | 12B | 7 | <i>Acinetobacter spp</i>    |                           |
|          |          |        | 13S00788-5 | 12B | 7 | <i>Pseudomonas spp</i>      |                           |
|          |          |        | 13S00788-6 | 12B | 7 | <i>Pseudomonas spp</i>      |                           |
| 13S00792 | 6.22E+10 | 1.0000 | 13S00792-4 | 16B | 7 | <i>Escherichia coli</i>     | CMY 2/61                  |
|          |          |        | 13S00792-5 | 16B | 7 | <i>Escherichia coli</i>     | CMY 2/61                  |
|          |          |        | 13S00792-6 | 16B | 7 | <i>Escherichia coli</i>     | CMY 2/61                  |
| 13S00883 | 2.12E+05 | 0.0000 | 13S00883-4 | 7A  | 8 | <i>Escherichia coli</i>     | CTX-M 1/61                |
|          |          |        | 13S00883-5 | 7A  | 8 | <i>Escherichia coli</i>     | CTX-M 1/61                |
|          |          |        | 13S00883-6 | 7A  | 8 | <i>Escherichia coli</i>     | CTX-M 1/61                |
|          |          |        | 13S00883-7 | 7A  | 8 | <i>Escherichia coli</i>     | CTX-M 1/61                |
|          |          |        | 13S00883-8 | 7A  | 8 | <i>Escherichia coli</i>     | CTX-M 1                   |
| 13S00884 | 1.00E+02 | 0.0000 | 13S00884-2 | 7B  | 8 | <i>Acinetobacter spp</i>    |                           |
|          |          |        | 13S00884-3 | 7B  | 8 | <i>Acinetobacter spp</i>    |                           |

|          |          |        |            |     |    |                          |                     |          |
|----------|----------|--------|------------|-----|----|--------------------------|---------------------|----------|
| 13S00887 | 5.88E+07 | 0.0010 | 13S00887-4 | 9A  | 8  | <i>Escherichia coli</i>  | CTX-M 2/20/44/56/97 | TEM 1b   |
|          |          |        | 13S00887-5 | 9A  | 8  | <i>Escherichia coli</i>  | CTX-M 2/20/44/56/97 | TEM 1b   |
|          |          |        | 13S00887-6 | 9A  | 8  | <i>Escherichia coli</i>  | CTX-M 2/20/44/56/97 | TEM 1b   |
| 13S00888 | 2.02E+07 | 0.0007 | 13S00888-4 | 9B  | 8  | <i>Escherichia coli</i>  | CTX-M 2/20/44/56/97 | TEM 1b   |
|          |          |        | 13S00888-5 | 9B  | 8  | <i>Escherichia coli</i>  | CTX-M 2/20/44/56/97 | TEM 1b   |
|          |          |        | 13S00888-6 | 9B  | 8  | <i>Escherichia coli</i>  | CTX-M 2/20/44/56/97 | TEM 1b   |
| 13S00890 | 5.21E+06 | 0.0012 | 13S00890-4 | 9C  | 8  | <i>Escherichia coli</i>  | CTX-M 2/20/44/56/97 | TEM 1b   |
|          |          |        | 13S00890-5 | 9C  | 8  | <i>Escherichia coli</i>  | CTX-M 2/20/44/56/97 | TEM 1b   |
|          |          |        | 13S00890-6 | 9C  | 8  | <i>Escherichia coli</i>  | CTX-M 2/20/44/56/97 | TEM 1b   |
| 13S00892 | 1.00E+02 | 0.0000 | 13S00892-3 | 12B | 8  | <i>Escherichia coli</i>  | CMY 2/61            |          |
| 13S00894 | 1.00E+02 | 0.0000 | 13S00894-3 | 5B  | 8  | <i>Escherichia coli</i>  | CTX-M 1             |          |
| 13S00896 | 2.50E+06 | 0.0375 | 13S00896-4 | 1B  | 8  | <i>Escherichia coli</i>  | CTX-M 15            | TEM 1b   |
|          |          |        | 13S00896-5 | 1B  | 8  | <i>Escherichia coli</i>  | CTX-M 15            | TEM 1b   |
|          |          |        | 13S00896-6 | 1B  | 8  | <i>Escherichia coli</i>  | CTX-M 15            | TEM 1b   |
| 13S00898 | 9.62E+03 | 0.0017 | 13S00898-5 | 21A | 8  | <i>Escherichia coli</i>  | CTX-M 1             | TEM 1b   |
| 13S00899 | 1.00E+05 | 0.0013 | 13S00899-2 | 21B | 8  | <i>Escherichia coli</i>  | TEM 1b              |          |
|          |          |        | 13S00899-5 | 21B | 8  | <i>Escherichia coli</i>  | CMY 2/61            |          |
| 13S00902 | 2.94E+07 | 1.0000 | 13S00902-4 | 5B  | 9  | <i>Escherichia coli</i>  | CTX-M 15            | OXA 1/30 |
|          |          |        | 13S00902-5 | 5B  | 9  | <i>Escherichia coli</i>  | CTX-M 15            | OXA 1/30 |
|          |          |        | 13S00902-6 | 5B  | 9  | <i>Escherichia coli</i>  | CTX-M 15            | OXA 1/30 |
| 13S00903 | 2.00E+06 | 0.0100 | 13S00903-4 | 12A | 9  | <i>Escherichia coli</i>  | CTX-M 1             | TEM 1b   |
|          |          |        | 13S00903-5 | 12A | 9  | <i>Escherichia coli</i>  | CTX-M 1             | TEM 1b   |
|          |          |        | 13S00903-6 | 12A | 9  | <i>Escherichia coli</i>  | CTX-M 1             | TEM 1b   |
| 13S00905 | 1.00E+02 | 0.0000 | 13S00905-3 | 2A  | 9  | <i>Escherichia coli</i>  | CMY 2/61            |          |
| 13S00906 | 1.00E+08 | 0.0048 | 13S00906-4 | 11A | 9  | <i>Escherichia coli</i>  | CTX-M 1             | TEM 1    |
|          |          |        | 13S00906-5 | 11A | 9  | <i>Escherichia coli</i>  | CTX-M 14/18         | TEM 1b   |
|          |          |        | 13S00906-6 | 11A | 9  | <i>Acinetobacter spp</i> |                     |          |
| 13S00911 | 1.00E+02 | 0.0000 | 13S00911-3 | 17A | 9  | <i>Escherichia coli</i>  | SHV 12/129          |          |
| 13S00914 | 1.00E+02 | 0.0000 | 13S00914-3 | 5B  | 10 | <i>Pseudomonas spp</i>   |                     |          |
| 13S00915 | 1.30E+10 | 0.1300 | 13S00915-4 | 18A | 10 | <i>Escherichia coli</i>  | CTX-M 1             |          |
|          |          |        | 13S00915-5 | 18A | 10 | <i>Escherichia coli</i>  | CTX-M 1/61          |          |
|          |          |        | 13S00915-6 | 18A | 10 | <i>Escherichia coli</i>  | CTX-M 1             |          |
| 13S00916 | 1.12E+07 | 0.0032 | 13S00916-4 | 19A | 10 | <i>Escherichia coli</i>  | CTX-M 1             |          |
|          |          |        | 13S00916-5 | 19A | 10 | <i>Escherichia coli</i>  | CTX-M 1             |          |
|          |          |        | 13S00916-6 | 19A | 10 | <i>Escherichia coli</i>  | CTX-M 14            |          |

|          |          |        |            |     |    |                             |                                    |
|----------|----------|--------|------------|-----|----|-----------------------------|------------------------------------|
|          |          |        | 13S00916-7 | 19A | 10 | <i>Escherichia coli</i>     | CTX-M 55/57 TEM 1b                 |
| 13S00917 | 3.13E+06 | 0.0001 | 13S00917-4 | 23A | 10 | <i>Escherichia coli</i>     | CTX-M 1 TEM 1b                     |
|          |          |        | 13S00917-5 | 23A | 10 | <i>Escherichia coli</i>     | CTX-M 1 TEM 1b                     |
|          |          |        | 13S00917-6 | 23A | 10 | <i>Escherichia coli</i>     | TEM 52c&135                        |
|          |          |        | 13S00917-7 | 23A | 10 | <i>Escherichia coli</i>     | TEM 52c&135                        |
|          |          |        | 13S00917-8 | 23A | 10 | <i>Acinetobacter spp</i>    | OXA-23-like                        |
| 13S00918 | 3.85E+05 | 0.0003 | 13S00918-4 | 24A | 10 | <i>Escherichia coli</i>     | CMY 2                              |
|          |          |        | 13S00918-5 | 24A | 10 | <i>Escherichia coli</i>     | CMY 2                              |
|          |          |        | 13S00918-6 | 24A | 10 | <i>Escherichia coli</i>     | TEM 52c                            |
|          |          |        | 13S00918-7 | 24A | 10 | <i>Escherichia coli</i>     | SHV 12/129                         |
| 13S00919 | 1.00E+02 | 0.0000 | 13S00919-3 | 24B | 10 | <i>Escherichia coli</i>     | CMY 2                              |
| 13S00920 | 1.00E+02 | 0.0000 | 13S00920-3 | 6A  | 10 | <i>Enterobacter cloacae</i> |                                    |
| 13S00926 | 4.17E+06 | 0.0060 | 13S00926-4 | 15A | 10 | <i>Escherichia coli</i>     | CTX-M 1                            |
|          |          |        | 13S00926-5 | 15A | 10 | <i>Escherichia coli</i>     | CTX-M 1                            |
|          |          |        | 13S00926-6 | 15A | 10 | <i>Escherichia coli</i>     | CTX-M 1                            |
|          |          |        | 13S00926-7 | 15A | 10 | <i>Escherichia coli</i>     | CTX-M 1 TEM 1b                     |
| 13S00928 | 1.76E+06 | 0.0001 | 13S00928-4 | 15C | 10 | <i>Escherichia coli</i>     | CMY 2/61                           |
|          |          |        | 13S00928-5 | 15C | 10 | <i>Escherichia coli</i>     | SHV 12/129 TEM 1                   |
|          |          |        | 13S00928-6 | 15C | 10 | <i>Escherichia coli</i>     | CTX-M 1 TEM 1b                     |
|          |          |        | 13S00928-7 | 15C | 10 | <i>Escherichia coli</i>     | CTX-M 1 TEM 1b                     |
| 13S00929 | 1.00E+02 | 0.0000 | 13S00929-3 | 12A | 10 | <i>Escherichia coli</i>     | CMY 2 TEM 35 (accession: KP860986) |
| 13S00940 | 9.80E+05 | 0.0012 | 13S00940-4 | 22A | 11 | <i>Escherichia coli</i>     | TEM 52c                            |
|          |          |        | 13S00940-5 | 22A | 11 | <i>Escherichia coli</i>     | CTX-M 2/97                         |
|          |          |        | 13S00940-6 | 22A | 11 | <i>Escherichia coli</i>     | CTX-M 32                           |
| 13S00944 | 2.40E+07 | 0.0277 | 13S00944-4 | 3A  | 11 | <i>Escherichia coli</i>     | CMY 2/61 TEM 1b/104                |
|          |          |        | 13S00944-5 | 3A  | 11 | <i>Escherichia coli</i>     | CMY 2/61 TEM 1b/104                |
|          |          |        | 13S00944-6 | 3A  | 11 | <i>Escherichia coli</i>     | CMY 2/61 TEM 1b                    |
| 13S00951 | 2.94E+08 | 0.2146 | 13S00951-4 | 11A | 12 | <i>Escherichia coli</i>     | CTX-M 1 OXA 1/30 TEM 1b&1d         |
|          |          |        | 13S00951-5 | 11A | 12 | <i>Escherichia coli</i>     | CTX-M 1 OXA 1/30 TEM 1b&1d         |
|          |          |        | 13S00951-6 | 11A | 12 | <i>Escherichia coli</i>     | CTX-M 1 OXA 1/30 TEM 1b&1d         |
| 13S00956 | 4.17E+04 | 0.0001 | 13S00956-4 | 5B  | 12 | <i>Escherichia coli</i>     | CTX-M 1 TEM 1b                     |
|          |          |        | 13S00956-5 | 5B  | 12 | <i>Escherichia coli</i>     | CTX-M 1                            |
|          |          |        | 13S00956-6 | 5B  | 12 | <i>Escherichia coli</i>     | CTX-M 1 TEM 1b                     |
|          |          |        | 13S00956-7 | 5B  | 12 | <i>Escherichia coli</i>     | TEM 52c                            |

|          |          |        |            |     |    |                               |                          |
|----------|----------|--------|------------|-----|----|-------------------------------|--------------------------|
| 13S00969 | 1.00E+02 | 0.0002 | 13S00969-3 | 16A | 13 | <i>Ochrobactrum spp</i>       |                          |
| 13S00971 | 9.80E+05 | 0.0001 | 13S00971-4 | 19A | 13 | <i>Escherichia coli</i>       | CTX-M 1                  |
|          |          |        | 13S00971-5 | 19A | 13 | <i>Escherichia coli</i>       | CTX-M 1                  |
|          |          |        | 13S00971-6 | 19A | 13 | <i>Escherichia coli</i>       | CTX-M 15 OXA 1/30 TEM 33 |
| 13S00972 | 4.31E+07 | 0.0031 | 13S00972-4 | 9A  | 13 | <i>Escherichia coli</i>       | CTX-M 1                  |
|          |          |        | 13S00972-5 | 9A  | 13 | <i>Escherichia coli</i>       | CTX-M 1                  |
|          |          |        | 13S00972-6 | 9A  | 13 | <i>Escherichia coli</i>       | CTX-M 1                  |
| 13S00973 | 1.47E+06 | 0.0000 | 13S00973-4 | 9B  | 13 | <i>Escherichia coli</i>       | CTX-M 1                  |
|          |          |        | 13S00973-5 | 9B  | 13 | <i>Escherichia coli</i>       | SHV 12/129               |
|          |          |        | 13S00973-6 | 9B  | 13 | <i>Escherichia coli</i>       | CTX-M 1                  |
| 13S00974 | 9.57E+06 | 0.0002 | 13S00974-4 | 9C  | 13 | <i>Escherichia coli</i>       | CMY 2                    |
|          |          |        | 13S00974-5 | 9C  | 13 | <i>Escherichia coli</i>       | CMY 2                    |
|          |          |        | 13S00974-6 | 9C  | 13 | <i>Escherichia coli</i>       | CMY 2                    |
| 13S00977 | 1.00E+02 | 0.0000 | 13S00977-3 | 2A  | 13 | <i>Pseudomonas aeruginosa</i> |                          |
| 13S00978 | 1.00E+02 | 0.0094 | 13S00978-3 | 3A  | 13 | <i>Acinetobacter spp</i>      |                          |
| 13S00980 | 4.79E+07 | 0.0012 | 13S00980-4 | 10A | 13 | <i>Escherichia coli</i>       | CMY 2 TEM 1b             |
|          |          |        | 13S00980-5 | 10A | 13 | <i>Escherichia coli</i>       | CTX-M 15 TEM 1varA&1varB |
|          |          |        | 13S00980-6 | 10A | 13 | <i>Escherichia coli</i>       | CMY 2/61 TEM 1b          |
| 13S00982 | 5.00E+07 | 0.0071 | 13S00982-4 | 15A | 14 | <i>Escherichia coli</i>       | SHV 12/129               |
|          |          |        | 13S00982-5 | 15A | 14 | <i>Escherichia coli</i>       | CTX-M 1                  |
|          |          |        | 13S00982-6 | 15A | 14 | <i>Escherichia coli</i>       | CTX-M 1                  |
|          |          |        | 13S00982-7 | 15A | 14 | <i>Escherichia coli</i>       | SHV 12/129               |
| 13S00983 | 1.00E+02 | 0.0000 | 13S00983-3 | 15B | 14 | <i>Escherichia coli</i>       | CTX-M 1                  |
|          |          |        | 13S00984-4 | 15C | 14 | <i>Escherichia coli</i>       | CTX-M 1                  |
|          |          |        | 13S00984-5 | 15C | 14 | <i>Escherichia coli</i>       | <i>ampC</i> type 11      |
|          |          |        | 13S00984-6 | 15C | 14 | <i>Escherichia coli</i>       | CTX-M 1                  |
| 13S00984 | 1.54E+08 | 0.0025 | 13S00984-7 | 15C | 14 | <i>Pseudomonas aeruginosa</i> |                          |
| 13S00986 | 1.85E+06 | 0.0003 | 13S00986-4 | 24A | 14 | <i>Escherichia coli</i>       | CTX-M 1                  |
|          |          |        | 13S00986-5 | 24A | 14 | <i>Escherichia coli</i>       | CTX-M 1                  |
|          |          |        | 13S00986-6 | 24A | 14 | <i>Escherichia coli</i>       | CTX-M 1                  |
| 13S00987 | 4.00E+07 | 0.0057 | 13S00987-4 | 24B | 14 | <i>Escherichia coli</i>       | CTX-M 1                  |
|          |          |        | 13S00987-5 | 24B | 14 | <i>Escherichia coli</i>       | CTX-M 1/61               |
|          |          |        | 13S00987-6 | 24B | 14 | <i>Escherichia coli</i>       | CTX-M 1                  |

|          |          |        |            |     |    |                               |                               |
|----------|----------|--------|------------|-----|----|-------------------------------|-------------------------------|
| 13S00988 | 6.86E+06 | 0.0175 | 13S00988-4 | 17A | 14 | <i>Escherichia coli</i>       | CTX-M 1                       |
|          |          |        | 13S00988-5 | 17A | 14 | <i>Escherichia coli</i>       | CTX-M 1                       |
|          |          |        | 13S00988-6 | 17A | 14 | <i>Escherichia coli</i>       | CTX-M 1                       |
| 13S00989 | 7.14E+04 | 0.0008 | 13S00989-4 | 17B | 14 | <i>Escherichia coli</i>       | CTX-M 1                       |
|          |          |        | 13S00989-5 | 17B | 14 | <i>Escherichia coli</i>       | TEM 1b                        |
|          |          |        | 13S00989-6 | 17B | 14 | <i>Escherichia coli</i>       | TEM 1b                        |
| 13S00990 | 1.90E+06 | 0.0009 | 13S00990-4 | 18A | 14 | <i>Escherichia coli</i>       | CTX-M 1                       |
|          |          |        | 13S00990-5 | 18A | 14 | <i>Escherichia coli</i>       | CTX-M 15                      |
|          |          |        | 13S00990-6 | 18A | 14 | <i>Escherichia coli</i>       | CTX-M 1                       |
| 13S01005 | 1.00E+02 | 0.0000 | 13S01005-3 | 3A  | 14 | <i>Escherichia coli</i>       | CTX-M 1 CMY 2/61 TEM 1b       |
| 13S01013 | 1.00E+05 | 0.0003 | 13S01013-4 | 22A | 16 | <i>Escherichia coli</i>       | CTX-M 2/20/44/56/97           |
|          |          |        | 13S01013-5 | 22A | 16 | <i>Escherichia coli</i>       | CTX-M 1 TEM 1                 |
|          |          |        | 13S01013-6 | 22A | 16 | <i>Escherichia coli</i>       | CTX-M 1 TEM 1b                |
| 13S01021 | 5.56E+05 | 0.0000 | 13S01021-4 | 11A | 17 | <i>Escherichia coli</i>       | CTX-M 14/18 TEM 1b            |
|          |          |        | 13S01021-5 | 11A | 17 | <i>Escherichia coli</i>       | <i>ampC</i> type 3            |
|          |          |        | 13S01021-6 | 11A | 17 | <i>Escherichia coli</i>       | CTX-M 14/18                   |
| 13S01027 | 1.00E+02 | 0.0000 | 13S01027-3 | 2A  | 17 | <i>Escherichia coli</i>       | CTX-M 3 TEM 1b                |
|          |          |        | 13S01027-6 | 2A  | 17 | <i>Pseudomonas aeruginosa</i> |                               |
| 13S01028 | 1.92E+04 | 0.0001 | 13S01028-4 | 7A  | 17 | <i>Escherichia coli</i>       | TEM 1                         |
|          |          |        | 13S01028-5 | 7A  | 17 | <i>Escherichia coli</i>       | TEM 1                         |
| 13S01029 | 1.00E+04 | 0.0000 | 13S01029-4 | 7B  | 17 | <i>Escherichia coli</i>       | CMY 2/61 TEM 33               |
|          |          |        | 13S01029-5 | 7B  | 17 | <i>Escherichia coli</i>       | CMY 2/61 TEM 33               |
| 13S01031 | 3.13E+06 | 0.0006 | 13S01031-4 | 9A  | 17 | <i>Escherichia coli</i>       | CTX-M 15                      |
|          |          |        | 13S01031-5 | 9A  | 17 | <i>Escherichia coli</i>       | CTX-M 14/18 TEM 1b            |
|          |          |        | 13S01031-6 | 9A  | 17 | <i>Escherichia coli</i>       | CTX-M 1                       |
| 13S01033 | 2.50E+06 | 0.0004 | 13S01033-4 | 9C  | 17 | <i>Escherichia coli</i>       | CTX-M 1 TEM 1&1b              |
|          |          |        | 13S01033-5 | 9C  | 17 | <i>Escherichia coli</i>       | CTX-M 1                       |
|          |          |        | 13S01033-6 | 9C  | 17 | <i>Escherichia coli</i>       | CTX-M 3                       |
| 13S01042 | 1.00E+02 | 0.0000 | 13S01042-3 | 21B | 17 | <i>Escherichia coli</i>       | <i>ampC</i> type 3 mutant     |
| 13S01053 | 1.63E+07 | 0.0080 | 13S01053-4 | 10A | 18 | <i>Escherichia coli</i>       | CTX-M 15 TEM 1varA            |
|          |          |        | 13S01053-5 | 10A | 18 | <i>Escherichia coli</i>       | CTX-M 15 TEM 1varA            |
|          |          |        | 13S01053-6 | 10A | 18 | <i>Escherichia coli</i>       | CTX-M 15 TEM 1varA            |
| 13S01061 | 5.32E+05 | 0.0001 | 13S01061-4 | 15A | 18 | <i>Escherichia coli</i>       | CMY 134 (accession: KP860987) |
|          |          |        | 13S01061-5 | 15A | 18 | <i>Escherichia coli</i>       | CMY 2/61                      |

|          |          |        |            |     |    |                         |                              |
|----------|----------|--------|------------|-----|----|-------------------------|------------------------------|
|          |          |        | 13S01061-6 | 15A | 18 | <i>Escherichia coli</i> | CTX-M 1                      |
|          |          |        | 13S01061-7 | 15A | 18 | <i>Escherichia coli</i> | ampC type 3                  |
| 13S01062 | 6.67E+07 | 0.0026 | 13S01062-4 | 15C | 18 | <i>Escherichia coli</i> | CTX-M 15 OXA 1/30 TEM 1varA  |
|          |          |        | 13S01062-5 | 15C | 18 | <i>Escherichia coli</i> | CTX-M 1 TEM 1b               |
|          |          |        | 13S01062-6 | 15C | 18 | <i>Escherichia coli</i> | CTX-M 15 OXA 1/30 TEM 1b/104 |
| 13S01063 | 1.00E+02 | 0.0000 | 13S01063-3 | 19A | 18 | <i>Escherichia coli</i> | ampC type 3                  |
| 13S01075 | 6.27E+05 | 0.0032 | 13S01075-4 | 17B | 18 | <i>Escherichia coli</i> | CTX-M 8 TEM 1b/104           |
|          |          |        | 13S01075-5 | 17B | 18 | <i>Escherichia coli</i> | CTX-M 14/18                  |
|          |          |        | 13S01075-6 | 17B | 18 | <i>Escherichia coli</i> | CTX-M 8                      |
|          |          |        | 13S01075-8 | 17B | 18 | <i>Escherichia coli</i> | TEM 52c                      |
| 13S01076 | 3.00E+04 | 0.0003 | 13S01076-4 | 18A | 19 | <i>Escherichia coli</i> | CTX-M 1                      |
|          |          |        | 13S01076-5 | 18A | 19 | <i>Escherichia coli</i> | CTX-M 32                     |
|          |          |        | 13S01076-6 | 18A | 19 | <i>Escherichia coli</i> | CTX-M 1                      |
| 13S01077 | 4.35E+05 | 0.0001 | 13S01077-4 | 22A | 19 | <i>Escherichia coli</i> | ampC type 3                  |
|          |          |        | 13S01077-5 | 22A | 19 | <i>Escherichia coli</i> | ampC type 3                  |
|          |          |        | 13S01077-6 | 22A | 19 | <i>Escherichia coli</i> | CTX-M 1 TEM 1b               |
| 13S01078 | 3.60E+06 | 0.0008 | 13S01078-4 | 24A | 19 | <i>Escherichia coli</i> | ampC type 3 mutant           |
|          |          |        | 13S01078-5 | 24A | 19 | <i>Escherichia coli</i> | CTX-M 1                      |
|          |          |        | 13S01078-6 | 24A | 19 | <i>Escherichia coli</i> | TEM 52c                      |
|          |          |        | 13S01078-7 | 24A | 19 | <i>Escherichia coli</i> | SHV 12/129                   |
| 13S01079 | 8.65E+04 | 0.0003 | 13S01079-4 | 24B | 19 | <i>Escherichia coli</i> | TEM 52c                      |
|          |          |        | 13S01079-5 | 24B | 19 | <i>Escherichia coli</i> | TEM 52c                      |
|          |          |        | 13S01079-6 | 24B | 19 | <i>Escherichia coli</i> | TEM 52c                      |
|          |          |        | 13S01079-8 | 24B | 19 | <i>Escherichia coli</i> | SHV 12/129                   |
| 13S01116 | 4.35E+05 | 0.0001 | 13S01116-4 | 9A  | 21 | <i>Escherichia coli</i> | SHV 12/129                   |
|          |          |        | 13S01116-5 | 9A  | 21 | <i>Escherichia coli</i> | SHV 12/129                   |
|          |          |        | 13S01116-6 | 9A  | 21 | <i>Escherichia coli</i> | SHV 12/129 TEM 1b            |
| 13S01118 | 4.81E+05 | 0.0002 | 13S01118-4 | 9C  | 21 | <i>Escherichia coli</i> | SHV 12/129 TEM 1&1b          |
|          |          |        | 13S01118-5 | 9C  | 21 | <i>Escherichia coli</i> | SHV 12/129                   |
|          |          |        | 13S01118-6 | 9C  | 21 | <i>Escherichia coli</i> | SHV 12/129 TEM 1&1b          |
| 13S01135 | 1.00E+06 | 0.0014 | 13S01135-4 | 11A | 21 | <i>Escherichia coli</i> | CTX-M 2/20/44/56/97 TEM 1b   |
|          |          |        | 13S01135-5 | 11A | 21 | <i>Escherichia coli</i> | CTX-M 1 TEM 1b               |
|          |          |        | 13S01135-6 | 11A | 21 | <i>Escherichia coli</i> | CTX-M 65                     |
| 13S01141 | 9.80E+05 | 0.0200 | 13S01141-4 | 5B  | 22 | <i>Escherichia coli</i> | CTX-M 15 OXA 1/30            |
|          |          |        | 13S01141-5 | 5B  | 22 | <i>Escherichia coli</i> | CTX-M 15 OXA 1/30            |

|          |          |        |            |     |    |                         |                            |
|----------|----------|--------|------------|-----|----|-------------------------|----------------------------|
|          |          |        | 13S01141-6 | 5B  | 22 | <i>Escherichia coli</i> | CTX-M 15 OXA 1/30          |
| 13S01143 | 2.14E+08 | 0.0583 | 13S01143-4 | 10A | 22 | <i>Escherichia coli</i> | SHV 12/129                 |
|          |          |        | 13S01143-5 | 10A | 22 | <i>Escherichia coli</i> | SHV 2                      |
|          |          |        | 13S01143-6 | 10A | 22 | <i>Escherichia coli</i> | TEM 1b&52StPaul            |
| 13S01151 | 8.24E+06 | 0.0047 | 13S01151-4 | 16A | 22 | <i>Escherichia coli</i> | TEM 52c                    |
|          |          |        | 13S01151-5 | 16A | 22 | <i>Escherichia coli</i> | CTX-M 14/18 OXA 1/30       |
|          |          |        | 13S01151-6 | 16A | 22 | <i>Escherichia coli</i> | CTX-M 2/20/44/56/97 TEM 1b |
|          |          |        | 13S01151-8 | 16A | 22 | <i>Escherichia coli</i> | CTX-M 2/20/44/56/97 TEM 1b |
| 13S01152 | 1.00E+02 | 0.0000 | 13S01152-3 | 16B | 22 | <i>Escherichia coli</i> | CTX-M 32                   |
| 13S01154 | 5.88E+07 | 0.0100 | 13S01154-4 | 15A | 22 | <i>Escherichia coli</i> | CTX-M 15 OXA 1/30          |
|          |          |        | 13S01154-5 | 15A | 22 | <i>Escherichia coli</i> | CTX-M 15 OXA 1/30          |
|          |          |        | 13S01154-6 | 15A | 22 | <i>Escherichia coli</i> | CTX-M 15 OXA 1/30          |
| 13S01155 | 1.00E+02 | 0.0000 | 13S01155-3 | 15C | 22 | <i>Escherichia coli</i> | TEM 52StPaul               |
| 13S01164 | 1.04E+05 | 0.0005 | 13S01164-4 | 18A | 23 | <i>Escherichia coli</i> | CMY 2/61                   |
|          |          |        | 13S01164-5 | 18A | 23 | <i>Escherichia coli</i> | CMY 2/61                   |
|          |          |        | 13S01164-6 | 18A | 23 | <i>Escherichia coli</i> | TEM 52StPaul               |
| 13S01165 | 1.04E+07 | 0.0010 | 13S01165-4 | 17A | 23 | <i>Escherichia coli</i> | CTX-M 14/18                |
|          |          |        | 13S01165-5 | 17A | 23 | <i>Escherichia coli</i> | <i>ampC</i> type 3         |
|          |          |        | 13S01165-6 | 17A | 23 | <i>Escherichia coli</i> | <i>ampC</i> type 3         |
| 13S01166 | 1.96E+06 | 0.0010 | 13S01166-4 | 17B | 23 | <i>Escherichia coli</i> | <i>ampC</i> type 3         |
|          |          |        | 13S01166-5 | 17B | 23 | <i>Escherichia coli</i> | <i>ampC</i> type 3         |
|          |          |        | 13S01166-6 | 17B | 23 | <i>Escherichia coli</i> | CTX-M 14/18                |
| 13S01175 | 1.00E+02 | 0.0000 | 13S01175-3 | 6A  | 23 | <i>Escherichia coli</i> | CTX-M 1 TEM 1b&1c          |
| 13S01176 | 2.13E+08 | 0.0334 | 13S01176-4 | 6B  | 23 | <i>Escherichia coli</i> | SHV 12/129                 |
|          |          |        | 13S01176-5 | 6B  | 23 | <i>Escherichia coli</i> | CTX-M 1 TEM 1b&1c          |
|          |          |        | 13S01176-6 | 6B  | 23 | <i>Escherichia coli</i> | CTX-M 14/18 TEM 1b         |
|          |          |        | 13S01176-7 | 6B  | 23 | <i>Escherichia coli</i> | CTX-M 14/18 TEM 1b         |
|          |          |        | 13S01176-8 | 6B  | 23 | <i>Escherichia coli</i> | TEM 1b&52StPaul            |
| 13S01188 | 4.90E+04 | 0.0001 | 13S01188-4 | 22A | 24 | <i>Escherichia coli</i> | CTX-M 65                   |
|          |          |        | 13S01188-5 | 22A | 24 | <i>Escherichia coli</i> | CTX-M 1 TEM 1b/104         |
|          |          |        | 13S01188-6 | 22A | 24 | <i>Escherichia coli</i> | <i>ampC</i> type 3         |
| 14S00011 | 4.22E+05 | 0.0008 | 14S00011-4 | 9A  | 26 | <i>Escherichia coli</i> | TEM 30var                  |
|          |          |        | 14S00011-5 | 9A  | 26 | <i>Escherichia coli</i> | TEM 30var                  |
|          |          |        | 14S00011-6 | 9A  | 26 | <i>Escherichia coli</i> | TEM 30var                  |
| 14S00012 | 5.21E+07 | 0.0575 | 14S00012-4 | 9B  | 26 | <i>Escherichia coli</i> | CTX-M 1                    |

|          |          |        |            |     |    |                         |                            |
|----------|----------|--------|------------|-----|----|-------------------------|----------------------------|
|          |          |        | 14S00012-5 | 9B  | 26 | <i>Escherichia coli</i> | CTX-M 1                    |
|          |          |        | 14S00012-6 | 9B  | 26 | <i>Escherichia coli</i> | CTX-M 1                    |
| 14S00013 | 1.00E+02 | 0.0000 | 14S00013-5 | 9C  | 26 | <i>Escherichia coli</i> | CTX-M 1                    |
| 14S00017 | 9.38E+06 | 0.0225 | 14S00017-4 | 11A | 26 | <i>Escherichia coli</i> | CTX-M 1                    |
|          |          |        | 14S00017-5 | 11A | 26 | <i>Escherichia coli</i> | CTX-M 15      TEM 1b&1varA |
|          |          |        | 14S00017-6 | 11A | 26 | <i>Escherichia coli</i> | CTX-M 15      TEM 1b&1varA |
| 14S00018 | 1.00E+02 | 0.0000 | 14S00018-3 | 19A | 26 | <i>Escherichia coli</i> | CTX-M 1                    |
|          |          |        | 14S00018-6 | 19A | 26 | <i>Escherichia coli</i> | CTX-M 1/61                 |
|          |          |        | 14S00018-7 | 19A | 26 | <i>Escherichia coli</i> | CTX-M 1                    |

6

7 Column CFU/g shows cfu/g faeces of non-wild-type Enterobacteriaceae with reduced susceptibility on MCC.

8 Column F shows fraction of cfu/g faeces of non-wild-type Enterobacteriaceae with reduced susceptibility on  
9 MCC compared to total Enterobacteriaceae on MC

10 \*Gene characterisation: AmpC types were assigned according to Mulvey *et al.* (9) Sequence references  
11 provided on [www.lahey.org/studies](http://www.lahey.org/studies) and the following reference strains were used for characterization: TEM-  
12 1b (GenBank no. AB263754), TEM-52c (GenBank no. AY883411) and TEM-52StPaul (GenBank no.  
13 AF126444). Alleles with double ID's (e.g. CMY-2/61) could not be distinguished based on the partial  
14 sequences obtained in the screening.

15

- 16 1. **Dierikx C, van Essen-Zandbergen A, Veldman K, Smith H, Mevius D.** 2010. Increased detection of  
17 extended spectrum beta-lactamase producing *Salmonella enterica* and *Escherichia coli* isolates from  
18 poultry. *Vet. Microbiol.* **145**:273–278.
- 19 2. **Carattoli A, García-Fernández A, Varesi P, Fortini D, Gerardi S, Penni A, Mancini C, Giordano**  
20 **A.** 2008. Molecular epidemiology of *Escherichia coli* producing extended-spectrum beta-lactamases  
21 isolated in Rome, Italy. *J. Clin. Microbiol.* **46**:103–108.
- 22 3. **Jiang X, Zhang Z, Li M, Zhou D, Ruan F, Lu Y.** 2006. Detection of extended-spectrum beta-  
23 lactamases in clinical isolates of *Pseudomonas aeruginosa*. *Antimicrob. Agents Chemother.* **50**:2990–  
24 2995.
- 25 4. **Paauw A, Fluit AC, Verhoef J, Leverstein-van Hall MA.** 2006. *Enterobacter cloacae* outbreak and  
26 emergence of quinolone resistance gene in Dutch hospital. *Emerg. Infect. Dis.* **12**:807–812.
- 27 5. **Dierikx CM, van Duijkeren E, Schoormans AHW, van Essen-Zandbergen A, Veldman K, Kant**  
28 **A, Huijsdens XW, van der Zwaluw K, Wagenaar J a, Mevius DJ.** 2012. Occurrence and  
29 characteristics of extended-spectrum- $\beta$ -lactamase- and AmpC-producing clinical isolates derived from  
30 companion animals and horses. *J. Antimicrob. Chemother.* **67**:1368–1374.
- 31 6. **Hordijk J, Mevius DJ, Kant A, Bos MEH, Graveland H, Bosman AB, Hartskeerl CM, Heederik**  
32 **DJJ, Wagenaar JA.** 2013. Within-farm dynamics of ESBL/AmpC-producing *Escherichia coli* in veal  
33 calves: a longitudinal approach. *J. Antimicrob. Chemother.* **68**:2468–76.
- 34 7. **Voets GM, Fluit AC, Scharringa J, Cohen Stuart J, Leverstein-van Hall MA.** 2011. A set of  
35 multiplex PCRs for genotypic detection of extended-spectrum  $\beta$ -lactamases, carbapenemases, plasmid-  
36 mediated AmpC  $\beta$ -lactamases and OXA  $\beta$ -lactamases. *Int. J. Antimicrob. Agents* **37**:356–359.
- 37 8. **Caroff N, Espaze E, Bérard I, Richet H, Reynaud A.** 1999. Mutations in the ampC promoter of  
38 *Escherichia coli* isolates resistant to oxyiminocephalosporins without extended spectrum  $\beta$ -lactamase  
39 production. *FEMS Microbiol. Lett.* **173**:459–465.

- 40 9. **Mulvey MR, Bryce E, Boyd DA, Ofner-Agostini M, Land AM, Simor AE, Paton S, Committee the**  
41 **CHE, Program the CHEC and the CNIS.** 2005. Molecular Characterization of Cefoxitin-Resistant  
42 *Escherichia coli* from Canadian Hospitals. *Antimicrob. Agents Chemother.* **49**:358–365.

43
